RESEARCH ARTICLE

# Reliability and measurement error of anterior maximum voluntary bite force in children with juvenile idiopathic arthritis and healthy children

Willemijn F. C. de Sonnaville<sup>1\*</sup>, Michel H. Steenks<sup>1</sup>, Nicolaas P. A. Zuithoff<sup>2</sup>, Nico M. Wulffraat<sup>3</sup>, Antoine J. W. P. Rosenberg<sup>1</sup>, Caroline M. Speksnijder<sup>1</sup>

**1** Department of Oral and Maxillofacial Surgery and Special Dental Care, University Medical Center Utrecht, Utrecht University, Utrecht, The Netherlands, **2** Julius Center for Health Sciences and Primary Care, University Medical Center Utrecht, Utrecht, The Netherlands, **3** Department of Pediatric Rheumatology and Immunology, Wilhelmina Children's Hospital, University Medical Center Utrecht, Utrecht University, Utrecht, The Netherlands

\* [w.f.c.desonnaville-3@umcutrecht.nl](mailto:w.f.c.desonnaville-3@umcutrecht.nl)

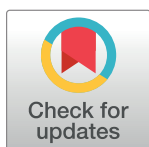

## OPEN ACCESS

**Citation:** de Sonnaville WFC, Steenks MH, Zuithoff NPA, Wulffraat NM, Rosenberg AJWP, Speksnijder CM (2023) Reliability and measurement error of anterior maximum voluntary bite force in children with juvenile idiopathic arthritis and healthy children. PLoS ONE 18(1): e0280763. <https://doi.org/10.1371/journal.pone.0280763>

**Editor:** Martina Ferrillo, University of Catanzaro, ITALY

**Received:** October 24, 2022

**Accepted:** January 8, 2023

**Published:** January 20, 2023

**Copyright:** © 2023 de Sonnaville et al. This is an open access article distributed under the terms of the [Creative Commons Attribution License](https://creativecommons.org/licenses/by/4.0/), which permits unrestricted use, distribution, and reproduction in any medium, provided the original author and source are credited.

**Data Availability Statement:** Our human research participant data contains pseudonymized and sensitive data such as age and disease duration. Our ethics committee advised us to restrict our data. We store our data in the public data repository DataverseNL: <https://doi.org/10.34894/Q4ITKP>. The data is not available for download directly via DataverseNL. Data is available on request by completing the <https://www.umcutrecht.nl/en/data-request-form-umcutrecht> request form. Only data requests in

## Abstract

In children with juvenile idiopathic arthritis (JIA) the temporomandibular joint (TMJ) can be involved. As a consequence, the oral function can be impaired due to joint and/or muscle involvement of the masticatory system with a negative influence on the maximum bite force. The aim of this cross-sectional study was to establish the reliability of AMVBF in children with JIA and healthy children. Children with JIA and healthy children conducted three attempts of AMVBF. The reliability of AMVBF measurement was determined by the intra-class correlation coefficient (ICC) by age, standard error of measurement (SEM), smallest detectable change (SDC), and limits of agreement (LoA). A total of 298 children with JIA and 168 healthy children were examined. The AMVBF measurements showed a good to excellent reliability in children with JIA based on the ICCs corrected for age (0.782–0.979). In healthy children, the reliability was moderate to excellent (0.546–0.999). The SDC in our study indicated that values above 11.4N might be a clinically relevant change over time in children with JIA. The LoA showed a wide spread of variability in both children with JIA (-72.6–44.4N) and healthy children (-79.9–72.8N). The Bland-Altman plots indicated that the differences between the test and retest increased in value proportionally to the biteforce value.

## Introduction

The voluntary bite force is mentioned as an indicator for the functional state of the masticatory system [1–3]. It has been studied in a variety of disciplines, such as temporomandibular pain and disorders, and in specific pathologies of the masticatory system [4, 5]. Furthermore, various devices and methods have been described to determine bite force, such as the type of transducer, strain-gauge, piezoelectric and pressure transducers, as well as the position of the transducer in between the teeth of the upper and lower dental arch (front teeth bite force or molar bite force) [4]. As a result, the bite force can vary per device, method and study

line with the Terms of Use will be taken into consideration. In addition to a completed request form, the Data Sharing Agreement (DSA) in line with GDPR regulations and/or the Research Collaboration Agreement (RCA) should be signed before data is shared. If a data request is approved, the data will be delivered in a safe and secure manner. By signing the DSA and/or RCA and accessing the Materials, the recipient represents his/her acceptance of the Terms of Use.

**Funding:** The authors received no specific funding for this work.

**Competing interests:** The authors have declared that no competing interests exist.

**Abbreviations:** AMVBF, Anterior maximum voluntary bite force; ANA, Antinuclear antibody; CI, Confidence interval; cJADAS, Clinical Juvenile Arthritis Disease Activity Score; DMARDS, Disease-modifying anti-rheumatic drugs; EDC, Electronic Data Capture; GCP, Good clinical practice; HLA-B27, Human leukocyte antigen B27; ICC, Intra-class correlation coefficient; ILAR, International League of Associations for Rheumatology; JIA, Juvenile idiopathic arthritis; k, Number of measurements; LoA, Limits of agreement; MSE, Mean square; MSR, Mean square of rows; N, Newtons; n, Number of subjects; NRS, Numeric rating scale; NSAIDS, Non-steroidal anti-inflammatory drugs; RF, Rheumatoid factor; SD, Standard deviation; SDC, Smallest detectable change; SEM, Standard error of measurement; SPSS, Statistical Package for the Social Sciences; TMJ, Temporomandibular joint; UMC, University medical center.

population [6]. In children with juvenile idiopathic arthritis (JIA) the temporomandibular joint (TMJ) can be affected. JIA is diagnosed when arthritis is characterized by inflammation of one or more joints and is present for at least six weeks with an onset before the age of 16 [7]. Epidemiological data of TMJ involvement prevalence vary widely (30–96%), depending on the definition of TMJ involvement, diagnostic methods and characteristics of study participants [8–11]. As a consequence of this TMJ involvement, the oral function can be impaired due to joint and/or muscle involvement of the masticatory system with a negative influence on the maximum bite force. In previous studies, the anterior maximum bite force in children with JIA was 24.0 Newtons (N) lower compared to healthy children, and even 42N lower in children with JIA and TMJ involvement [10, 12]. To appraise such a reduction, it is necessary to gain more insight in the reliability and smallest detectable change (SDC) of the maximum bite force in children with JIA and in healthy children. Monitoring the TMJ in a longitudinal evaluation is advised as an optimal management in patients with JIA [13]. Clinicians may interpret changes over time regarding bite force easier than absolute values. The interpretation of changes over time warrants knowledge regarding natural fluctuations in healthy children and in children with JIA: the SDC. The SDC is a concept to support the clinician in treatment decisions. The paediatric rheumatologist, following up on the TMJ status in children with JIA, is alerted whether the change over time is within the SDC or exceeds the SDC of AMVBF since this may indicate a clinically relevant change. For these reasons, quantifying the SDCs, intra-class correlation (ICC) and limits of agreement (LoAs) for bite force in children with JIA is a clinically relevant procedure. Therefore, the aim of this study was to establish the reliability of anterior maximum voluntary bite force (AMVBF) in children with JIA and in healthy children.

## Materials and methods

### Children with JIA

The AMVBF measurements in children with JIA were performed between January 2018 and February 2020 at the outpatient clinic of the Department of Pediatric Immunology and Rheumatology in collaboration with the Department of Oral and Maxillofacial Surgery and Special Dental Care of the University Medical Center (UMC) Utrecht, The Netherlands. The AMVBF measurements were carried out immediately after a regular consultation with the paediatric rheumatologist.

The inclusion criteria for participation were children with: 1) JIA as classified using the International League of Associations for Rheumatology criteria and 2) an age between 6 and 18 years old. Exclusion criteria were: 1) a history of mandibular trauma; 2) previous TMJ treatment, such as physical therapy, occlusal splints, intra-articular injections or maxillofacial surgery; 3) incisal dental restoration or non-erupted incisors; 4) an additional orofacial condition not related with JIA (e.g. dental pain or a pre-existing jaw or temporomandibular disorder); and 5) children who were not able to complete at least two AMVBF attempts.

We extracted the following data from the electronic medical record for these children: JIA subtype, date of JIA diagnosis, medication, length, weight, gender, age, the presence of antinuclear antibody (ANA) or rheumatoid factor (RF), and the clinical Juvenile Arthritis Disease Activity Score (cJADAS) [14].

### Healthy children

Healthy children were recruited and measured at primary schools in Utrecht and a high school in Tilburg, The Netherlands, between February 2018 and April 2019. The inclusion criteria for healthy children were: 1) age between 6 and 18 years old. The exclusion for healthy children

were: 1) a history of mandibular trauma; 2) previous TMJ treatment, such as physical therapy, occlusal splints, intra-articular injections or maxillofacial surgery; 3) incisal dental restoration or non-erupted incisors; 4) an additional orofacial condition not related with JIA (e.g. dental pain or a pre-existing jaw or temporomandibular disorder); 5) children who were not able to complete at least two AMVBF attempts; and 6) a score of at least 2 on the TMJ screening protocol ( $n = 12$ ) [15].

The study was carried out in accordance with The Code of Ethics of the World Medical Association. The study protocol, with study ID NL.METC-17-528/C, was approved by the Ethics Committee of the UMC Utrecht. All participants and their parents and/or guardians received written information and provided oral and signed informed consent. Data collection was performed using the Good Clinical Practice compliant Electronic Data Capture system Research Online. The proprietary Electronic Data Capture system is owned by the Julius Center at the UMC Utrecht.

### Anterior maximum voluntary bite force

The AMVBF was measured both in children with JIA and healthy children using a bite force transducer, based on the bite force transducer from the Amsterdam University Medical Center and further developed by the University Medical Center Utrecht [16]. The bite force gauge is a handheld device with a load cell to measure AMVBF, with a range between 0 and 490N in a linear fashion. The device consists of a strain gauge mounted on a mouthpiece of 10x15 mm and a thickness of 12 mm. Plastic foil was applied around the mouthpiece for each child to guarantee hygiene. The mouthpiece was placed between the upper and lower central incisors. The bite force measurement consisted of clenching, as hard as possible for ten seconds, at maximum. In one session, three attempts, AMVBF<sub>1</sub>, AMVBF<sub>2</sub> and AMVBF<sub>3</sub>, were documented and expressed in N. In between the three attempts, the children indicated when they were ready for the next attempt. All participants were instructed and encouraged in a similar way through a taped voice recording.

### Statistical analysis

The characteristics of the children are presented as numbers and percentages, or as means and standard deviations (SD). For the analyses of demographic and clinical data, the unpaired sample t-test was used for continuous data, and the chi-squared test was used for dichotomous or ordered categorical outcomes. Data were graphically evaluated on normal distribution.

The test-retest reliability was checked for the three measurements and depicted as AMVBF<sub>1-2</sub>, AMVBF<sub>2-3</sub> and AMVBF<sub>1-3</sub>, and calculated by the two-way random, absolute agreement, single measurement intraclass correlation coefficient (ICC<sub>2,1</sub>) and the associated 95% confidence intervals (CI). The ICC was calculated as  $\frac{MS_R - MS_E}{MS_R + (k-1)MS_E + \frac{k}{n}(MS_C - MS_E)}$  in which MS<sub>R</sub> = mean square of rows, MS<sub>E</sub> = mean square of error, k = number of measurements and n = number of subjects. The ICC explains the consistency of the measurements, and the cut-off points for the ICC were chosen as poor (<0.50), moderate (0.50–0.75), good (0.75–0.90) and excellent (>0.90) [17, 18]. In addition the ICC was corrected for age, as it can substantially overestimate the reliability [19]. The standard error of measurements (SEM) was calculated as  $SEM = SD \cdot \sqrt{1 - ICC}$ , with SD defined as the difference between the two AMVBFs. The SEM explains how much the values of the measurements of the test and retest differ from each other. The SEM percent change was calculated as  $SEM\% = (SEM/\bar{X}) \times 100$ , in which  $\bar{X}$  the mean of all measurements of test and retest.

The SDC was calculated as  $SDC = 1.96 \times \sqrt{2} \times SEM$  [20]. The SDC is the smallest statistically significant change of AMVBF that the bite force measurement can detect in individuals. The

SDC percent change was calculated as  $SDC\% = (SDC/\bar{X} * 100$ , in which  $\bar{X}$  is the mean of all measurements of test and retest.

In order to check for proportional bias, variability and agreement, Bland-Altman plots were constructed by plotting the test-retest difference versus the mean value of the test and retest [21]. Agreement between test and retest was summarized using the mean difference and SD of the difference, and the 95% limits of agreement (LoA) were calculated as  $LoA = \text{Mean} \pm 1.96 \times SD$  [21]. The LoA estimated the interval of the difference between the test and the retest. A p-value of less than 0.05 was accepted as significant. Statistical analyses were performed using SPSS 25 (IBM SPSS Statistics for Windows, Version 25.0. Armonk, NY: IBM Corp).

## Results

A total of 290 children with JIA and 168 healthy children were examined in this study. Of all measurements, in one healthy child AMVBF<sub>1,2,3</sub> was missing due to an open bite. In children with JIA, missing values were found of AMVBF<sub>1,2,3</sub> in eight individuals (technical problems (n = 2), mobility of the front teeth due mixed dentition (n = 2), pain of the front teeth (n = 1), misalignment of the front teeth (n = 1), no coordination to bite properly on the bite force transducer (n = 1), unknown (n = 1)). These missing values were excluded from the analyses.

### Children with JIA

Children with JIA had a mean age of 12.8 years (SD 3.4), and 197 (67.9%) of them were girls (Table 1). AMVBF<sub>2</sub> values were missing in two children with JIA due pain in the front teeth, while AMVBF<sub>3</sub> was missing in 11 children with JIA (due to not properly biting on the bite force transducer), pain in the front teeth (n = 4) and unknown reasons (n = 6)). In total, 288 measurements of AMVBF<sub>1-2</sub>, 278 of AMVBF<sub>2-3</sub> and 279 of AMVBF<sub>1-3</sub> were analysed. The disease characteristics of the children with JIA are presented in Table 1. The mean AMVBF<sub>1</sub> for children with JIA was 114.9 N (SD 57.5), AMVBF<sub>2</sub> 118.2 N (SD 59.1) and AMVBF<sub>3</sub> 133.5 N (SD 62.4) (Table 1).

The ICC showed a good correlation between the of AMVBF<sub>1-3</sub> (ICC = 0.855), and an excellent ICC for AMVBF<sub>1-2</sub> (ICC = 0.913) and AMVBF<sub>2-3</sub> (ICC = 0.909; Table 2). The ICCs corrected for age of AMVBF<sub>1,2,3</sub> varied between 0.782 and 0.979 and showed a good to excellent correlation (Table 3). The SEM for children with JIA was 2.1 N, 2.0 N and 4.1 N with a SEM% of 1.8%, 1.6%, and 3.3% for AMVBF<sub>1-2</sub>, AMVBF<sub>2-3</sub> and AMVBF<sub>1-3</sub>, respectively. The SDC was 5.9 N, 5.6 N and 11.4 N, with an SDC% of 5.0%, 4.4% and 9.1% for AMVBF<sub>1-2</sub>, AMVBF<sub>2-3</sub> and AMVBF<sub>1-3</sub>. The LoA varied between -72.58 and 44.4 (LoA; AMVBF<sub>1-2</sub> = -50.87–44.39, AMVBF<sub>2-3</sub> = -57.77–28.87 and AMVBF<sub>1-3</sub> = -72.58–38.36; Figs 1–3; Table 2).

### Healthy children

In the group of healthy children, the mean age was 11.4 years old (SD 3.5) and 81 (48.2%) were girls (Table 1). A total of 168 measurements were analysed for AMVBF<sub>1-2</sub>, AMVBF<sub>2-3</sub> and AMVBF<sub>1-3</sub>. The mean AMVBF for healthy children for attempt 1 was 137.0 N (SD 63.3), attempt 2 133.6 N (SD 62.7), and attempt 3 142.4 N (SD 63.7) (Table 1).

The ICC of AMVBF<sub>1-2</sub> (ICC = 0.842), AMVBF<sub>2-3</sub> (ICC = 0.849), AMVBF<sub>1-3</sub> (ICC = 0.819) showed a good correlation. The ICCs corrected for age of AMVBF<sub>1,2,3</sub> varied between 0.546 and 0.999 and showed a moderate to excellent correlation (Table 3). The SEM was 5.6, 5.1 and 6.9 with a SEM% of 4.1%, 3.7% and 4.9% for AMVBF<sub>1-2</sub>, AMVBF<sub>2-3</sub> and AMVBF<sub>1-3</sub>, respectively. The SDC for healthy children was 15.5 N, 14.2 N and 19.1 N, with an SDC% of 11.5%, 10.3% and 13.7% for AMVBF<sub>1-2</sub>, AMVBF<sub>2-3</sub> and AMVBF<sub>1-3</sub>. The LoA varied between -79.94

Table 1. Demographics and AMVBF of children with JIA and healthy controls.

|                                          | JIA (n = 290) | Healthy children (n = 168) | P-value             |
|------------------------------------------|---------------|----------------------------|---------------------|
| Gender (n, %)                            |               |                            | <0.001 <sup>a</sup> |
| Male                                     | 93 (32.1)     | 87 (51.8)                  |                     |
| Female                                   | 197 (67.9)    | 81 (48.2)                  |                     |
| Mean age (years; mean, SD)               | 12.8 (3.4)    | 11.4 (3.5)                 | <0.001 <sup>b</sup> |
| Mean weight (kg; mean, SD)               | 50.9 (17.5)   | 46.7 (17.2)                | 0.014 <sup>b</sup>  |
| Mean height (cm; mean, SD)               | 157.4 (17.9)  | 152.8 (20.9)               | 0.018 <sup>b</sup>  |
| Orthodontic treatment (n, %)             | 47 (16.2)     | 17 (10.1)                  | 0.070 <sup>a</sup>  |
| Medication use (n, %)                    | 220 (75.9)    | 14 (8.3)                   | <0.001 <sup>a</sup> |
| Clinical remission off medication        | 70 (24.1)     |                            |                     |
| JIA subtype (n, %)                       |               |                            |                     |
| Systemic                                 | 29 (10.0)     |                            |                     |
| Oligoarticular, persistent               | 110 (37.9)    |                            |                     |
| Oligoarticular, extended                 | 31 (10.7)     |                            |                     |
| Polyarticular, RF-                       | 61 (21.0)     |                            |                     |
| Polyarticular, RF+                       | 15 (5.2)      |                            |                     |
| Enthesitis-related                       | 17 (5.9)      |                            |                     |
| Psoriatic arthritis                      | 15 (5.2)      |                            |                     |
| Undifferentiated                         | 12 (4.1)      |                            |                     |
| Laboratory studies (n, %)                |               |                            |                     |
| Positive ANA                             | 91 (31.4)     |                            |                     |
| Positive RF                              | 14 (4.8)      |                            |                     |
| Positive HLA-B27                         | 21 (7.2)      |                            |                     |
| Mean disease duration (months; mean, SD) | 62.4 (51.8)   |                            |                     |
| cJADAS (n, %)                            |               |                            |                     |
| 0–2 (low)                                | 182 (62.8)    |                            |                     |
| 3–7 (moderate)                           | 60 (20.7)     |                            |                     |
| ≥8 (high)                                | 42 (14.5)     |                            |                     |
| Missing                                  | 6 (2.1)       |                            |                     |
| Medication use (n, %)                    |               |                            |                     |
| NSAIDs                                   | 87 (30.0)     |                            |                     |
| Corticosteroids                          | 14 (4.8)      |                            |                     |
| DMARDs                                   | 134 (46.2)    |                            |                     |
| Biologicals                              | 86 (29.7)     |                            |                     |
| No medication                            | 70 (24.1)     |                            |                     |
| DMARDs (n, %)                            |               |                            |                     |
| Methotrexate                             | 115 (39.7)    |                            |                     |
| Leflunomide                              | 12 (4.1)      |                            |                     |
| Azathioprine                             | 2 (0.7)       |                            |                     |
| Sulfasalazine                            | 2 (0.7)       |                            |                     |
| Other                                    | 3 (1.0)       |                            |                     |
| No DMARDs                                | 156 (53.8)    |                            |                     |
| Biologicals (n, %)                       |               |                            |                     |
| Adalimumab                               | 40 (13.8)     |                            |                     |
| Etanercept                               | 23 (7.9)      |                            |                     |
| Tocilizumab                              | 6 (2.1)       |                            |                     |
| Canakinumab                              | 5 (1.7)       |                            |                     |
| Golimumab                                | 5 (1.7)       |                            |                     |

(Continued)

Table 1. (Continued)

|                               | JIA (n = 290) | Healthy children (n = 168) | P-value             |
|-------------------------------|---------------|----------------------------|---------------------|
| Abatacept                     | 1 (0.3)       |                            |                     |
| Anakinra                      | 2 (0.7)       |                            |                     |
| Infliximab                    | 1 (0.3)       |                            |                     |
| Other                         | 3 (1.0)       |                            |                     |
| No biologicals                | 204 (70.3)    |                            |                     |
| AMVBF <sub>1</sub> (mean, SD) | 114.9 (57.5)  | 137.0 (63.3)               | <0.001 <sup>b</sup> |
| AMVBF <sub>2</sub> (mean, SD) | 118.2 (59.1)  | 133.6 (62.7)               | 0.010 <sup>b</sup>  |
| AMVBF <sub>3</sub> (mean, SD) | 133.5 (62.4)  | 142.4 (63.7)               | 0.148 <sup>b</sup>  |

<sup>a</sup> chi-squared test;<sup>b</sup> independent sample t-test.

ANA: antinuclear antibody; AMVBF: anterior voluntary bite force; cJADAS: Clinical Juvenile Arthritis Disease Activity Score; DMARDs: disease-modifying anti-rheumatic drugs; HLA-B27: human leukocyte antigen B27; JIA: juvenile idiopathic arthritis; NSAIDs: non-steroidal anti-inflammatory drugs; RF: rheumatoid factor; SD: standard deviation; TMJ: temporomandibular joint.

<https://doi.org/10.1371/journal.pone.0280763.t001>

Table 2. Reliability of the anterior voluntary maximum bite force (AMVBF) for children with JIA and healthy children.

|                                  | JIA                               |                                   |                                   | Healthy children                  |                                   |                                   |
|----------------------------------|-----------------------------------|-----------------------------------|-----------------------------------|-----------------------------------|-----------------------------------|-----------------------------------|
|                                  | AMVBF <sub>1-2</sub><br>(n = 288) | AMVBF <sub>2-3</sub><br>(n = 278) | AMVBF <sub>1-3</sub><br>(n = 279) | AMVBF <sub>1-2</sub><br>(n = 168) | AMVBF <sub>2-3</sub><br>(n = 168) | AMVBF <sub>1-3</sub><br>(n = 168) |
| Difference test-retest mean (SD) | -3.24 (24.3)                      | -14.45 (22.1)                     | -17.11 (28.3)                     | 3.39 (35.4)                       | -8.86 (33.9)                      | -5.46 (38.0)                      |
| ICC                              | 0.913                             | 0.909                             | 0.855                             | 0.842                             | 0.849                             | 0.819                             |
| 95% CI                           | 0.891–0.930                       | 0.769–0.953                       | 0.690–0.919                       | 0.792–0.881                       | 0.793–0.889                       | 0.762–0.863                       |
| SEM                              | 2.11                              | 2.01                              | 4.10                              | 5.59                              | 5.12                              | 6.88                              |
| SEM%                             | 1.81%                             | 1.58%                             | 3.27%                             | 4.14%                             | 3.71%                             | 4.92%                             |
| SDC                              | 5.85                              | 5.57                              | 11.37                             | 15.50                             | 14.19                             | 19.06                             |
| SDC%                             | 5.03%                             | 4.39%                             | 9.06%                             | 11.46%                            | 10.28%                            | 13.65%                            |
| 95% LoA                          | -50.87–44.39                      | -57.77–28.87                      | -72.58–38.36                      | -65.99–72.77                      | -75.30–57.58                      | -79.94–69.02                      |

Abbreviations: AMVBF: anterior maximum voluntary bite force; CI: confidence interval; ICC: intra-class correlation coefficient; LoA: limits of agreement; SDC: smallest detectable change; SDC%: SDC/mean of all measurements of test and retest; SEM: standard error of measurement; SEM%: SEM/mean of all measurements of test and retest.

<https://doi.org/10.1371/journal.pone.0280763.t002>

and 72.77 (LoA; AMVBF<sub>1-2</sub> = -65.99–72.77, AMVBF<sub>2-3</sub> = -75.30–57.58 and AMVBF<sub>1-3</sub> = -79.94–69.02; Figs 4–6, Table 2).

Outliers were identified through the Bland-Altman plots. We checked these outliers for procedural errors. No explanation was found for the outliers, and therefore we interpreted these as normal fluctuations.

## Discussion

The reliability of AMVBF in children with JIA and in healthy children was evaluated by determining the ICC, SEM, SDC, LoA and Bland-Altman plots. The established ICCs showed at least good reliability in children with JIA. The ICCs corrected for age showed in children with JIA good to excellent ICCs and in healthy children moderate to excellent ICCs. While the ICC is a relative measure of reliability, the SEM is an absolute index for reliability. The SEM in children with JIA varied between 2.0 N and 4.1 N, and in healthy children between 5.1 N and 6.9

**Table 3. Intra class-correlation corrected for age of the anterior voluntary maximum bite force (AMVBF) for children with JIA and healthy children.**

| Age | JIA |       | Healthy children |       |
|-----|-----|-------|------------------|-------|
|     | N   | ICC   | N                | ICC   |
| 6   | 17  | 0.964 | 7                | 0.821 |
| 7   | 10  | 0.979 | 25               | 0.738 |
| 8   | 16  | 0.852 | 13               | 0.651 |
| 9   | 19  | 0.833 | 19               | 0.868 |
| 10  | 16  | 0.847 | 12               | 0.812 |
| 11  | 18  | 0.865 | 11               | 0.843 |
| 12  | 24  | 0.965 | 9                | 0.899 |
| 13  | 31  | 0.919 | 11               | 0.894 |
| 14  | 28  | 0.855 | 20               | 0.932 |
| 15  | 34  | 0.933 | 16               | 0.546 |
| 16  | 38  | 0.820 | 11               | 0.880 |
| 17  | 23  | 0.956 | 12               | 0.589 |
| 18  | 16  | 0.782 | 2                | 0.999 |

AMVBF: anterior maximum voluntary bite force; ICC: intra-class correlation coefficient.

The ICC was calculated by using data for AMVBF<sub>1,2,3</sub>.

<https://doi.org/10.1371/journal.pone.0280763.t003>

N. This is relatively small compared to the mean of the measured AMVBFs (114.9–142.4 N; Table 1). Moreover, the SEM values are below the SDC, varying between 5.6 N and 19.1 N. A difference of 11.4 N (9.1%) can at least be detected in children with JIA, and 19.1 N (13.7%) in healthy children as a true difference instead of the result of measurement uncertainty. The

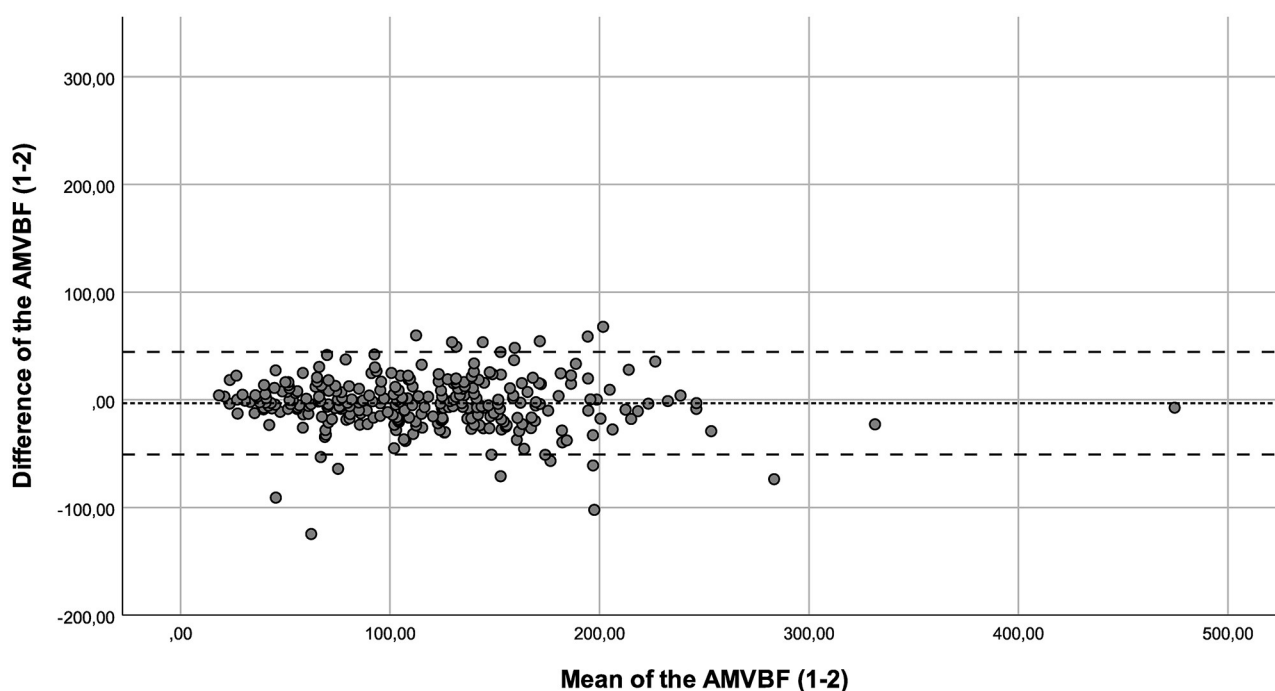

**Fig 1. Bland-Altman plot for the difference between test and retest (test 1–2) of the anterior maximum voluntary bite force (AMVBF) for patients with JIA.** The dashed line represents the mean difference between test and retest, and the striped lines represent the 95% limits of agreement.

<https://doi.org/10.1371/journal.pone.0280763.g001>



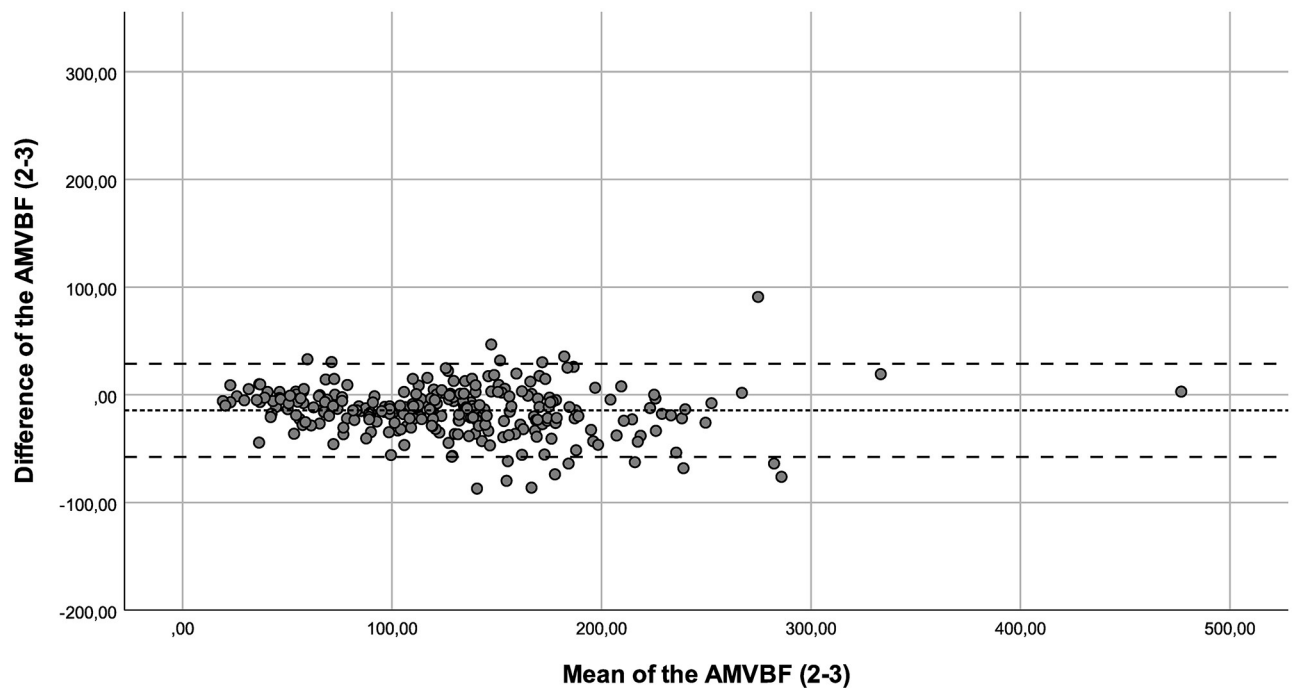

**Fig 2.** Bland-Altman plot for the difference between test and retest (test 2–3) of the anterior maximum voluntary bite force (AMVBF) for patients with JIA. The dashed line represents the mean difference between test and retest, and the striped lines represent the 95% limits of agreement.

<https://doi.org/10.1371/journal.pone.0280763.g002>

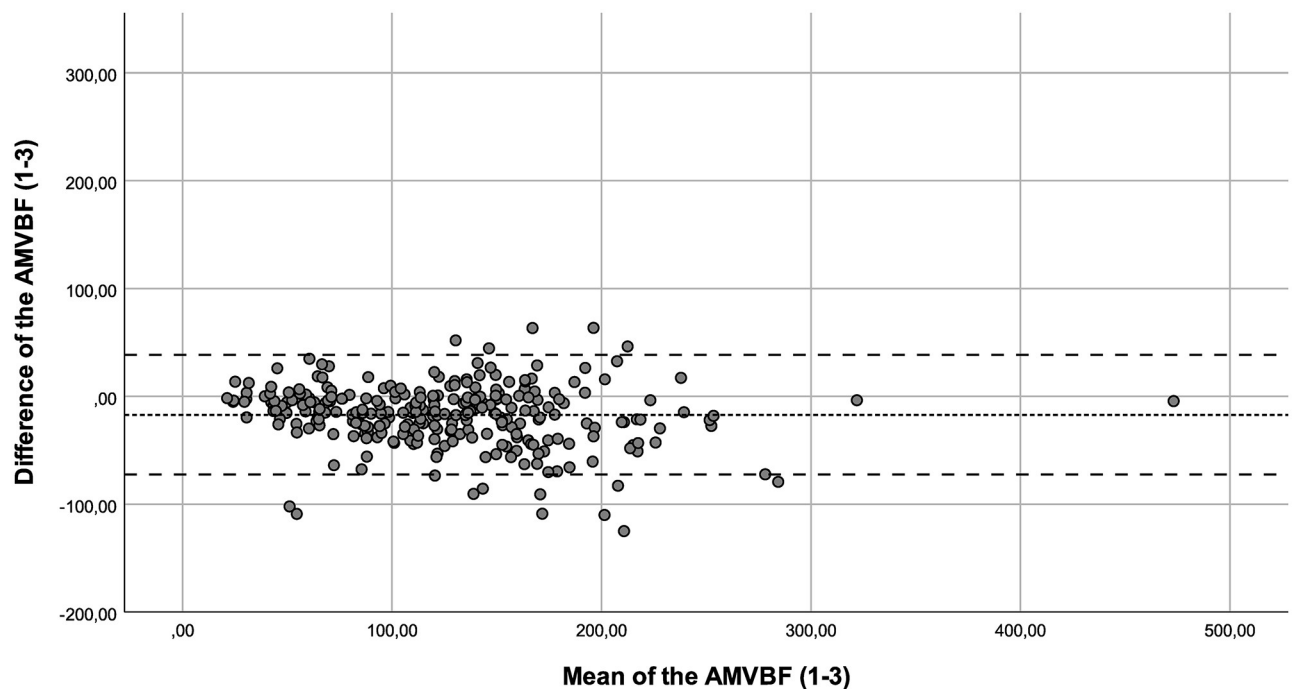

**Fig 3.** Bland-Altman plot for the difference between test and retest (test 1–3) of the anterior maximum voluntary bite force (AMVBF) for patients with JIA. The dashed line represents the mean difference between test and retest, and the striped lines represent the 95% limits of agreement.

<https://doi.org/10.1371/journal.pone.0280763.g003>



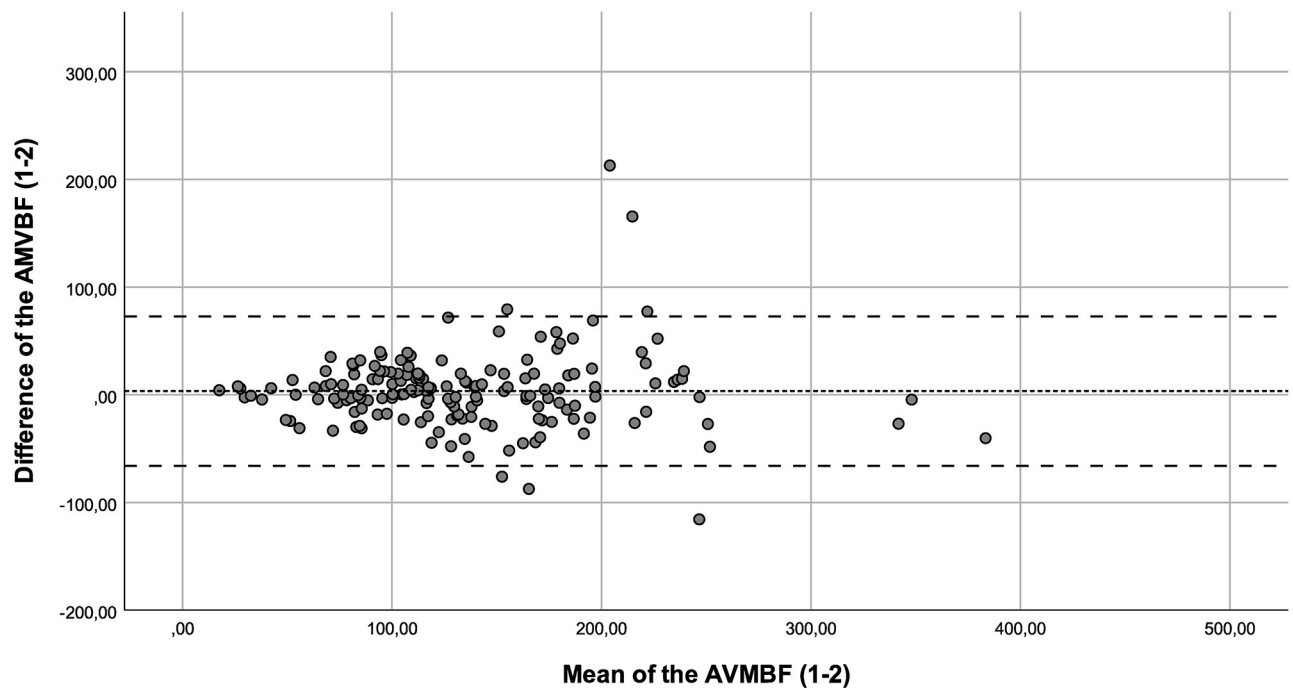

**Fig 4. Bland-Altman plot for the difference between test and retest (test 1–2) of the anterior maximum voluntary bite force (AMVBF) for healthy children.** The dashed line represents the mean difference between test and retest, and the striped lines represent the 95% limits of agreement.

<https://doi.org/10.1371/journal.pone.0280763.g004>

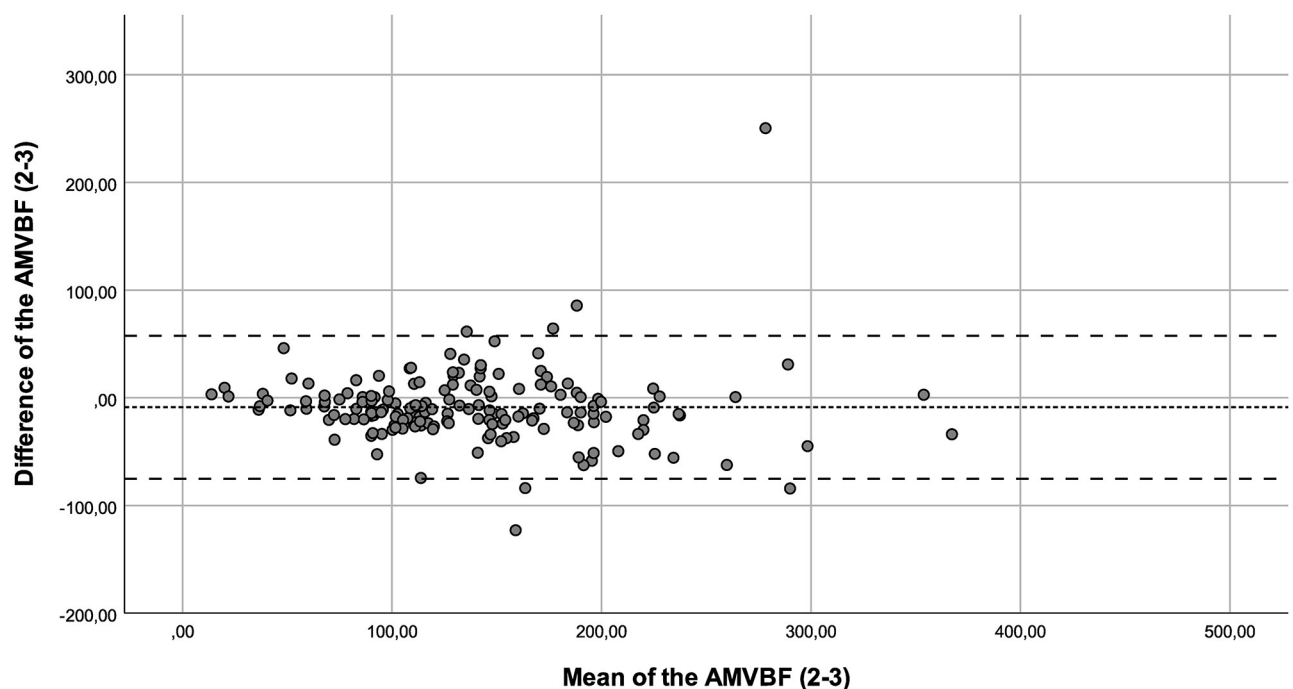

**Fig 5. Bland-Altman plot for the difference between test and retest (test 2–3) of the anterior maximum voluntary bite force (AMVBF) for healthy children.** The dashed line represents the mean difference between test and retest, and the striped lines represent the 95% limits of agreement.

<https://doi.org/10.1371/journal.pone.0280763.g005>

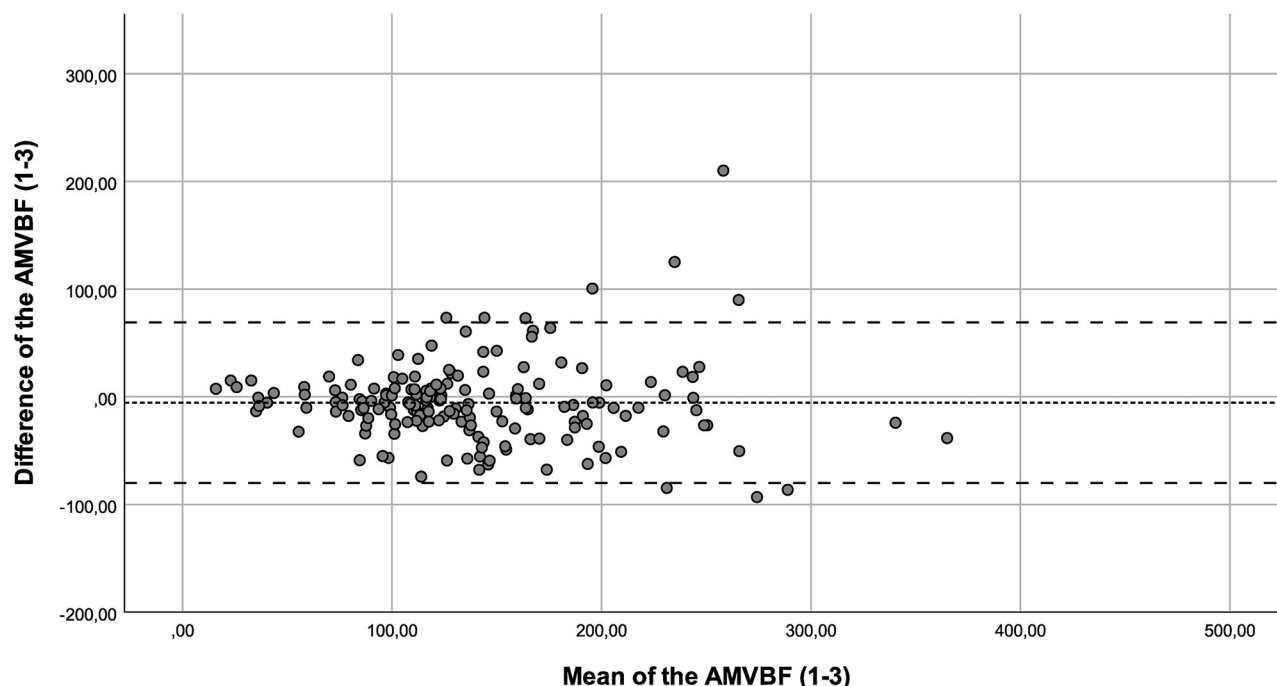

**Fig 6. Bland-Altman plot for the difference between test and retest (test 1–3) of the anterior maximum voluntary bite force (AMVBF) for healthy children.** The dashed line represents the mean difference between test and retest, and the striped lines represent the 95% limits of agreement.

<https://doi.org/10.1371/journal.pone.0280763.g006>

LoA showed a wide spread of variability in both children with JIA and healthy children, with the highest ranges in  $AMVBF_{1-3}$ .

The ICC showed good to excellent reliability in both children with JIA and healthy children. However, ICC shows the degree of association and not agreement [22]. In our data, we found a trend for increasing bite force levels during the attempts. This is also reflected in the mean  $AMVBF$ ;  $AMVBF_3$  showed the highest value (Table 1). A possible explanation for this might be a learning effect, i.e. getting used to the bite force transducer. During data collection, we also noticed a competitive effect during the measurements: in the third attempt, children wanted to reach the highest possible bite force.

Additionally, we noticed in the Bland-Altman plots that the differences between the test and retest increased in value proportionally to the bite force value. This offers nuance regarding the calculated wide ranges of the LoA. In such cases, a transformation of the data on a log scale can be useful [22]. The log transformed data provide the spread of variability adjusted to the amount of  $AMVBF$ . The difficulty in interpreting such log transformed variables for clinical use is a main concern [23]. Therefore, we decided not to use transformation on a log scale. The LoA are probably too wide for small  $AMVBF$  values, and probably too narrow for large  $AMVBF$  values. As a result, lower  $AMVBF$  values seem to be more reliable than larger  $AMVBF$  values. This finding may be relevant, as the main clinical focus is on lower  $AMVBF$  values in children with JIA. Lower  $AMVBF$  values were found in children with JIA and TMJ involvement, while higher  $AMVBF$  values were found in children with JIA without TMJ involvement and in healthy children [10, 12].

Greater variability has been reported in older healthy children than in younger healthy children [19, 24]. Therefore, ICCs corrected for age are recommended. In our study, we found good to excellent ICCs in all ages in children with JIA, while in healthy children, the ICC was moderate in children at the ages of 8, 15 and 17 years. However, we did notice greater

variability in larger bite force measurements. This may correspond with the increase in bite force with each year of age, and the proportional increase in SD (S1 Table).

Most studies have examined molar bite force, generating a higher bite force value than those from the interincisal region [19, 25, 26]. The recording technique influences the bite force level, but also its variability [19]. Therefore, it is difficult to compare different recording techniques with each other [1, 25]. Interincisal bite force was found to have the highest reliability in healthy children [19]. Another reason to choose the interincisal bite force measurement is the more symmetrical bite than bite force measurements with unilateral molar bites. Moreover, the bite force transducer in the molar region will lead to a larger gape than interincisal bites, which might be technically more difficult to apply. This can be cumbersome in some younger children and in children with a restricted mouth opening, for example children with JIA. However, interincisal measurements may have some disadvantages as well. The pressure exerted on the front teeth may result in an unusual sensation that could have influenced the bite force results. In our data, one child did not complete all bite force attempts due to pain of the front teeth, and was therefore excluded from the analysis. In addition, two attempts of AMVBF<sub>2</sub> and four attempts of AMVBF<sub>3</sub> were missing due to pain in the front teeth.

In conclusion, AMVBF measurements showed good to excellent reliability in children with JIA based on the ICCs corrected for age. In healthy children, the reliability was moderate to excellent. The SDC in our study indicated that values above 11.4N in children with JIA might be a clinically relevant change over time. In further studies the founded SDC can be useful for longitudinal monitoring of the AMVBF in children with JIA, as this is suggested as an optimal management in patients with JIA [13]. Wide ranges of LoA were found in both children with JIA and in healthy children. However, we noticed in the Bland-Altman plots that the differences between the test and retest increased in value proportionally to the bite force value. Therefore, the LoA are probably too wide for small AMVBF values, and probably too narrow for large AMVBF values. Overall, low AMVBF values in children with JIA seemed to have the highest reliability in our study. This finding may be useful, as the main clinical focus is on lower AMVBF values in children with JIA.

## Supporting information

**S1 Table. Mean AMVBF and SD by age.** Abbreviations: AMVBF: anterior maximum voluntary bite force; JIA: juvenile idiopathic arthritis; SD: standard deviation. (DOCX)

## Acknowledgments

We would like to acknowledge the product development support of our colleagues from the department of Medical Technology & Clinical Physics.

## Author Contributions

**Conceptualization:** Willemijn F. C. de Sonnaville, Michel H. Steenks, Nico M. Wulffraat, Antoine J. W. P. Rosenberg, Caroline M. Speksnijder.

**Data curation:** Willemijn F. C. de Sonnaville, Nicolaas P. A. Zuithoff.

**Formal analysis:** Willemijn F. C. de Sonnaville.

**Funding acquisition:** Nico M. Wulffraat, Antoine J. W. P. Rosenberg.

**Investigation:** Willemijn F. C. de Sonnaville, Michel H. Steenks.

**Methodology:** Nicolaas P. A. Zuithoff, Caroline M. Speksnijder.

**Project administration:** Nico M. Wulffraat, Antoine J. W. P. Rosenberg.

**Supervision:** Michel H. Steenks, Nico M. Wulffraat, Antoine J. W. P. Rosenberg, Caroline M. Speksnijder.

**Visualization:** Willemijn F. C. de Sonnaville.

**Writing – original draft:** Willemijn F. C. de Sonnaville, Michel H. Steenks, Nicolaas P. A. Zuithoff, Caroline M. Speksnijder.

**Writing – review & editing:** Michel H. Steenks, Nicolaas P. A. Zuithoff, Nico M. Wulffraat, Antoine J. W. P. Rosenberg, Caroline M. Speksnijder.

## References

1. Koc D, Dogan A, Bek B. Bite force and influential factors on bite force measurements: a literature review. *Eur J Dent*. 2010; 4(2):223–32. PMID: [20396457](#)
2. Pereira LJ, Duarte Gavião MB, Van Der Bilt A. Influence of oral characteristics and food products on masticatory function. *Acta Odontol Scand*. 2006; 64(4):193–201. <https://doi.org/10.1080/00016350600703459> PMID: [16829493](#)
3. van der Bilt A, Tekamp A, Van Der Glas H, Abbink J. Bite force and electromyography during maximum unilateral and bilateral clenching. *Eur J Oral Sci*. 2008; 116(3):217–22. <https://doi.org/10.1111/j.1600-0722.2008.00531.x> PMID: [18471239](#)
4. Verma TP, Kumathalli KI, Jain V, Kumar R. Bite force recording devices—A review. *J Clin Diagnostic Res*. 2017; 11(9):ZE01–5. <https://doi.org/10.7860/JCDR/2017/27379.10450> PMID: [29207848](#)
5. Van Bruggen HW, Wadman RI, Bronkhorst EM, Leeuw M, Creugers N, Kalaykova SI, et al. Mandibular dysfunction as a reflection of bulbar involvement in SMA type 2 and 3. *Neurology*. 2016; 86(6):552–9. <https://doi.org/10.1212/WNL.0000000000002348> PMID: [26764025](#)
6. Kruse T, Lehmann HC, Braumann B, Fink GR, Wunderlich G. The maximum bite force fortreatment evaluation in severely affected adult SMA patients—Protocol for a longitudinal study. *Front Neurol*. 2020; 11(February):1–6.
7. Petty RE, Southwood TR, Manners P, Baum J, Glass DN, Goldenberg J, et al. International League of Associations for Rheumatology Classification of juvenile idiopathic arthritis: second revision, Edmonton, 2001. *J Rheumatol*. 2004; 31(2):390–2. PMID: [14760812](#)
8. Stoustrup P, Rahimi H, Twilt M, Goh YI, Pedersen TK, Herlin T, et al. Assessment of orofacial symptoms in juvenile idiopathic arthritis: Validation of a consensus-based short patient questionnaire. *J Rheumatol [Internet]*. 2022;1–20. Available from: <https://doi.org/10.3899/jrheum.220667> PMID: [36455952](#)
9. Stoll ML, Kau CH, Waite PD, Cron R. Temporomandibular joint arthritis in juvenile idiopathic arthritis, now what? *Pediatr Rheumatol*. 2018; 16(1):273–85.
10. de Sonnaville W, Speksnijder C, Zuithoff N, Verkouteren D, Wulffraat N, Steenks M, et al. Maximum bite force in children with juvenile idiopathic arthritis with and without clinical established temporomandibular joint involvement and in healthy children; a cross-sectional study. *J Oral Rehabil*. 2021;0–2. <https://doi.org/10.1111/joor.13172> PMID: [33780558](#)
11. Stoustrup P, Resnick CM, Pedersen TK, Abramowicz S, Kùseler A, Verna C, et al. Standardizing terminology and assessment for orofacial conditions in juvenile idiopathic arthritis: International, multidisciplinary consensus-based recommendations. *J Rheumatol*. 2019;(46):518–22. <https://doi.org/10.3899/jrheum.180785> PMID: [30647179](#)
12. Wenneberg B, Kjellberg H, Kiliaridis S. Bite force and temporomandibular disorder in juvenile chronic arthritis. *J Oral Rehabil*. 1995; 22(8):633–41. <https://doi.org/10.1111/j.1365-2842.1995.tb01061.x> PMID: [7472737](#)
13. Stoustrup P, Resnick CM, Abramowicz S, Pedersen TK, Michelotti A, Kùseler A, et al. Management of orofacial manifestations of juvenile idiopathic arthritis: Interdisciplinary consensus-based recommendations. *Arthritis Rheumatol*. 2022; 0(0):1–11. <https://doi.org/10.1002/art.42338> PMID: [36041065](#)
14. Consolaro A, Negro G, Chiara Gallo M, Bracciolini G, Ferrari C, Schiappapietra B, et al. Defining criteria for disease activity states in nonsystemic juvenile idiopathic arthritis based on a three-variable Juvenile Arthritis Disease Activity Score. *Arthritis Care Res*. 2014; 66(11):1703–9. <https://doi.org/10.1002/acr.22393> PMID: [24980508](#)

15. Steenks MH, Giancane G, de Leeuw RRJ, Bronkhorst EM, van Es RJJ, Koole R, et al. Temporomandibular joint involvement in juvenile idiopathic arthritis: reliability and validity of a screening protocol for the rheumatologist. *Pediatr Rheumatol*. 2015; 13(1):1–8.
16. Weijnenberg RAF, Lobbezoo F, Knol DL, Tomassen J, Scherder EJA. Increased masticatory activity and quality of life in elderly persons with dementia—a longitudinal matched cluster randomized single-blind multicenter intervention study. *BMC Neurol*. 2013; 13:1–9.
17. de Vet HCW, Terwee CB, Mokkink LB KD. *Measurement in Medicine; a practical guide*. 1st edn. New York, NY: Cambridge University Press; 2011. 96–149 p.
18. Weir JP. Quantifying Test-Retest Reliability Using the Intraclass Correlation Coefficient and the SEM. *J Strength Cond Res*. 2005; 19(1):231–40.
19. Rodán S, Buschang PH, Isaza Saldarriaga JF, Throckmorton G. Reliability of maximum bite force measurements in age-varying populations. *J Oral Rehabil*. 2009; 36(11):801–7. <https://doi.org/10.1111/j.1365-2842.2009.01997.x> PMID: 19758288
20. Kropmans TJB, Dijkstra RU, Stegenga B, Stewart R, De Bont LGM. Smallest detectable difference in outcome variables related to painful restriction of the temporomandibular joint. *J Dent Res*. 1999; 78(3):784–9. <https://doi.org/10.1177/00220345990780031101> PMID: 10096454
21. Bland JM, Altman DG. Statistical Methods for assessing agreement between two methods of clinical measurement. *Lancet*. 1986; 327(8476):307–10. PMID: 2868172
22. Bland JM, Altman DG. Applying the right statistics: Analyses of measurement studies. *Ultrasound Obstet Gynecol*. 2003; 22(1):85–93. <https://doi.org/10.1002/uog.122> PMID: 12858311
23. Euser AM, Dekker FW, le Cessie S. A practical approach to Bland-Altman plots and variation coefficients for log transformed variables. *J Clin Epidemiol*. 2008; 61(10):978–82. <https://doi.org/10.1016/j.jclinepi.2007.11.003> PMID: 18468854
24. Kamegai T, Tatsuki T, Nagano H, Mitsuhashi H, Kumeta J, Tatsuki Y, et al. A determination of bite force in northern Japanese children. *Eur J Orthod*. 2005; 27(1):53–7. <https://doi.org/10.1093/ejo/cjh090> PMID: 15743863
25. van der Bilt A. Assessment of mastication with implications for oral rehabilitation: a review. *J Oral Rehabil*. 2011; 38(10):754–80. <https://doi.org/10.1111/j.1365-2842.2010.02197.x> PMID: 21241351
26. Tortopidis D, Lyons MF, Baxendale RH, Gilmour WH. The variability of bite force measurement between sessions, in different positions within the dental arch. *J Oral Rehabil*. 1998; 25(9):681–6. <https://doi.org/10.1046/j.1365-2842.1998.00293.x> PMID: 9758398
